# Supplementary material for: Techno-economic insights and deployment prospects of permanent carbon dioxide sequestration in solid carbonates
Source: Royal Society of Chemistry journal article supplement (doi:10.1039/d4ee03166k), 2024-01-01
Supplement: d4ee03166k1.pdf [file d4ee03166k1.pdf]

## Supplementary material 1

### Techno-economic insights and deployment prospects of permanent carbon dioxide sequestration in solid carbonates

Andreas Mühlbauer<sup>1,2</sup>, Dominik Keiner<sup>2,\*</sup>, Christian Breyer<sup>2,\*</sup>

<sup>1</sup> Dept. of Civil and Environmental Engineering, Stanford University, Stanford, CA, 94305, US

<sup>2</sup> School of Energy Systems, LUT University, Yliopistonkatu 34, Lappeenranta, 53850, Finland

\* Corresponding authors: dominik.keiner@lut.fi, christian.breyer@lut.fi

#### Table of Contents

|                                             |           |
|---------------------------------------------|-----------|
| <b>Note 1: In-situ mineralisation</b> ..... | <b>4</b>  |
| Cost assumptions .....                      | 4         |
| Energy demand .....                         | 5         |
| <b>Note 2: Ex-situ mineralisation</b> ..... | <b>6</b>  |
| Cost assumptions .....                      | 6         |
| Energy demand .....                         | 7         |
| <b>Note 3: Enhanced weathering</b> .....    | <b>9</b>  |
| Cost assumptions .....                      | 9         |
| Energy demand .....                         | 9         |
| <b>References</b> .....                     | <b>11</b> |

## Note 1: In-situ mineralisation

### General information

A general estimation of the CO<sub>2</sub> sequestration capacity is using Eq. (1).

$$G_{CO_2} = A \cdot h \cdot \varphi \cdot E_{CO_2} \quad (1)$$

Wherein  $G_{CO_2}$  is the total sequestration potential,  $A$  is the area of the rock formation,  $h$  is the effective height of the formation,  $\varphi$  is the average porosity, and  $E_{CO_2}$  is the storage efficiency.  $E_{CO_2}$  is defined as the CO<sub>2</sub> storage per pore volume and is generally 18.8-48.7 kgCO<sub>2</sub>/m<sup>3</sup> [1] with the estimate provided by McGrail et al. [2] lying within that range. Oelkers et al. [3] summarise reported areas of 21 distinct onshore basaltic provinces as well as peridotite massifs and calculates the estimated CO<sub>2</sub> mineralisation potential therein using Eq. (1) with an estimated thickness of 500 m and a conservative  $E_{CO_2}$  of 10 kgCO<sub>2</sub>/m<sup>3</sup> and 30 kgCO<sub>2</sub>/m<sup>3</sup> for basalt and peridotite, respectively. Goldberg et al. [4] present a concise list of offshore MIN<sub>IN</sub> sites with an overall expected total storage potential of 8238 - 41,191 GtC (29,657 - 148,288 GtCO<sub>2</sub>). Injection rates of about 0.3-0.7 MtCO<sub>2</sub>/a per well are reported [5–7], whereas, at the Wallula basalt pilot project, only 14.6 ktCO<sub>2</sub>/a were injected per well [8]. In this study, an area demand of injection wells of about 28 km<sup>2</sup> per 1 MtCO<sub>2</sub>/a well array is assumed based on analyses of subsurface CO<sub>2</sub> plumes' radiuses in a recent study [9] and is in line with CO<sub>2</sub> storage models [8]. The specific area demand for MIN<sub>IN</sub> is assumed to be 28 km<sup>2</sup>/(MtCO<sub>2</sub>·a) in this study. Kelemen et al. [10] assumed an effective area demand of 62,500 m<sup>2</sup> per well, capable of injecting 1-10 ktCO<sub>2</sub>/a, resulting in 6.25-62.5 km<sup>2</sup>/(MtCO<sub>2</sub>·a) for a hybrid DACCS and MIN<sub>IN</sub> site sequestering atmospheric CO<sub>2</sub> in peridotite. All MIN<sub>IN</sub> storage sites as well as their cumulative and annual potential are listed in the supplementary information 2. Because of significant uncertainties regarding the economic sequestration potential, a conservative case estimating only 10% of the theoretical storage potential to be technically and economically feasible is assumed. This assumption is yet to be confirmed by industrial-scale MIN<sub>IN</sub> projects and bears therefore significant uncertainty.

### Cost assumptions

Since data on economic parameters of MIN<sub>IN</sub> are still scarce, analogies from CO<sub>2</sub> injection in other subsurficial CO<sub>2</sub> sequestration sites must be employed. An average injection rate of 0.7 MtCO<sub>2</sub>/a is assumed at an average investment cost of 75 m€ per well [7] resulting in a CAPEX of 108.6 €/tCO<sub>2</sub>/a. For the CarbFix projected, cost of MIN<sub>IN</sub> of 20-30 USD/tCO<sub>2</sub> for an injection rate of 10-20 ktCO<sub>2</sub>/a are expected [11,12]. Kelemen et al. [10] note that MIN<sub>IN</sub> costs, based on cost estimations by Gunnarsson et al. [13], 10-

40 USD/tCO<sub>2</sub> more compared to underground storage via injection of supercritical CO<sub>2</sub> in geological formations.

### **Energy demand**

To compress CO<sub>2</sub> dissolved in freshwater for subsurface injection into suitable MIN<sub>IN</sub> sites, about 70 kWh<sub>el</sub>/tCO<sub>2</sub> are required [14]. The electricity demand is therefore mainly due to CO<sub>2</sub> compression and no heat demand is considered.

## Note 2: Ex-situ mineralisation

### General information

Myers and Nakagaki [15] conducted a regional study on MIN<sub>EX</sub> and concluded that Japan alone can achieve CDR at the rate of up to 7.6 GtCO<sub>2</sub>/a. Slag-based MIN<sub>EX</sub> is expected to enable cumulative MIN<sub>EX</sub> of 26.4-41.9 GtCO<sub>2</sub> between 2020 and 2100 [16]. Steel slag's high CaO and MgO content of about 37%<sub>wt</sub> and 9.1%<sub>wt</sub>, respectively, and the resulting weathering potential of around 384.7 kgCO<sub>2</sub>/t of slag, make it a valuable feedstock for MIN<sub>EX</sub>, with an expected global potential of 320-870 MtCO<sub>2</sub>/a in 2100 [17]. Renforth [17] notes that about 185 t of blast furnace slag and 117 t of steel slag are produced per tonne of crude steel. Production of one tonne of aluminium produces 3.45 t of bauxite residues, that can neutralise 44-66 kgCO<sub>2</sub>/t of bauxite residues [17]. About 115 kg of cement kiln dust are produced per tonne of cement clinker [17]. All these industrial solid wastes are suitable feedstocks for ex-situ CO<sub>2</sub> mineralisation. Pan et al. [18] also emphasise the potential for additional indirectly avoided CO<sub>2</sub> emissions by utilising carbonates as filler material in concrete blocks or cement mortars.

### Cost assumptions

Strunge et al. [19] examine a business case in the cement industry for MIN<sub>EX</sub> using an integrated techno-economic assessment finding that CO<sub>2</sub> emissions can be reduced by partially substituting cement and filler material for concrete with silica and produced carbonates, respectively [20–22]. The opportunities of MIN<sub>EX</sub> for the cement industry, a hard-to-abate CO<sub>2</sub> emitter, was also studied by Ostovari et al. [23]. In a subsequent study, Ostovari et al. [24] modelled possible supply chains for the required feedstock, CO<sub>2</sub> source, source of renewable energy, and markets for the carbonates in the European context. Faber et al. [25] adapted learning rates of 10.55% to project future CAPEX of MIN<sub>EX</sub> plants, based on estimations by Rubin et al. [26].

Gerdemann et al. [27] assumed a carbonation cost of 78-537 USD/tCO<sub>2</sub> depending on different feedstock, pre-treatment methods and regions in 2007. In 2013, Olajire et al. [28] assumed total cost of mineral carbonation of about 105 USD/tCO<sub>2</sub> avoided, while Geerlings and Zevenhoven [29] found a cost range of 15-100 USD/tCO<sub>2</sub> depending on the solid product value.

For feedstock rock mining, Beerling et al. [30] assumed a CAPEX of 6.0 €/tRock/a and an OPEX<sub>fix</sub> of 4.6 €/tRock for an open-pit mine that has an ore output of 10,000 t/d and an economic lifetime of 10 years. The CAPEX estimates align with Goll et al. [31], who stated a CAPEX for open-pit mining of 1.8-7.1 €/tRock but a significantly higher OPEX<sub>fix</sub> of 12.7-27.9 €/tRock. Kelemen et al. [10] state costs for quarrying, crushing, and grinding

of mine tailings at ~8.3 €/tRock. Strefler et al. [32] made an best estimate of 4.4 €/tRock for the CAPEX and of 22.2 €/tRock for the OPEXfix of rock mining and grinding, ore processing, waste rock handling, and infrastructure development. The rock transportation cost are assumed to be 4.4 €/(tRock•100 km) [32].

## Energy demand

If energy demand is not further specified into electricity or heat, no such specification was provided by the respective reference.

Goll et al. [31] also assumed electricity demand of 27.8-83.3 kWh/tRock for rock mining and crushing, as well as 19.2-169.3 kWh<sub>el</sub>/tRock for grinding rock to 20 µm. Strefler et al. [32] gave a best estimate on the electricity demand of 19.4 kWh<sub>el</sub>/tRock, 55.6 kWh<sub>el</sub>/tRock, 127.8 kWh<sub>el</sub>/tRock, and 833.4 kWh<sub>el</sub>/tRock for rock grinding to 50 µm, 20 µm, 10 µm, and 2 µm, respectively. Also, an electricity demand of 2.8-8.3 kWh<sub>el</sub>/tRock for mining and crushing is assumed [32]. The practical minimum energy demand for rock mining including extraction and material handling is stated to be around 5.1 kWh/tRock [33]. Teir et al. [34] expect that for MIN<sub>EX</sub> using serpentine 44.4-52.8 kWh<sub>el</sub>/tCO<sub>2</sub> for grinding the rock to <74 µm are required.

Gerdemann et al. [27] found a total pre-treatment energy demand of 13-376 kWh/tRock, resulting in different mineralisation performances, which leads to a total energy demand of 429-2431 kWh/tCO<sub>2</sub>. Geerlings and Zevenhoven [29] state a range in energy demand of 694-2,777 kWh/tCO<sub>2</sub>, while Veetil and Hitch [35] assume a total energy demand of 470-640 kWh/tCO<sub>2</sub> for MIN<sub>EX</sub>. Wang et al [36] states that MIN<sub>EX</sub> has a total energy demand including pre-treatment of 600-1200 kWh/tCO<sub>2</sub> depending on the type of feedstock, while it was stated that MIN<sub>EX</sub> using olivine requires 447 kWh/tCO<sub>2</sub> [37]. Zevenhoven et al. [38] simulated diverse MIN<sub>EX</sub> routes using serpentine and found an exergy demand of 720 kWh<sub>th</sub>/tCO<sub>2</sub> and 247 kWh<sub>el</sub>/tCO<sub>2</sub> for dry carbonation and 4,277 kWh<sub>th</sub>/tCO<sub>2</sub> for wet carbonation of CO<sub>2</sub> from flue gas of a lime kiln. Huijgen et al. [39] find a total electricity demand 403 kWh<sub>el</sub>/tCO<sub>2</sub>, 253 kWh<sub>el</sub>/tCO<sub>2</sub> thereof for grinding the feedstock and a total heat demand of 47 kWh<sub>th</sub>/tCO<sub>2</sub> for wollastonite in direct aqueous MIN<sub>EX</sub>. When steel slag was used as a feedstock, the electricity demand was 400 kWh<sub>el</sub>/tCO<sub>2</sub> and the heat demand was 354 kWh<sub>th</sub>/tCO<sub>2</sub> [39]. The feedstock material was ground to a particle size <38 µm and the aqueous MIN<sub>EX</sub> was conducted at 200°C and 20 bara partial CO<sub>2</sub> pressure. Ostovari et al. [24] optimised a MIN<sub>EX</sub> value chain on the European level by employing techno-economic parameters for three MIN<sub>EX</sub> process configurations first introduced by Ostovari et al. [40]. Mineralising 1 tonne of CO<sub>2</sub> using 2 tonne of olivine in a reactor at 100 bar requires 103 kWh<sub>th</sub> and 689 kWh<sub>el</sub> [24,40,41]. When 2.55 tonne of serpentine are used to mineralise 1 tonne CO<sub>2</sub> at 115 bar 452 kWh<sub>th</sub> and 455 kWh<sub>el</sub> are

required and for mineralising 1 tonne CO<sub>2</sub> using 4.4 tonne steel slag 407 kWh<sub>th</sub> and 592 kWh<sub>el</sub> are needed [24,27,39,40]. To derive these energy balances, Ostovari et al. [40] employed process simulations and assumed that 80% of sensible heat in treated feedstock can be recovered.

## **Note 3: Enhanced weathering**

### **Cost assumptions**

Strefler et al. [32] conclude that EW is a viable CDR option potentially capable of removing 95 GtCO<sub>2</sub>/a at cost of 50 €/tCO<sub>2</sub> (60 USD/tCO<sub>2</sub>) and 4.9 GtCO<sub>2</sub>/a at cost of 167 €/tCO<sub>2</sub> (200 USD/tCO<sub>2</sub>) for dunite and basalt, respectively. Beerling et al. [30] conclude that 0.5-2.0 GtCO<sub>2</sub>/a can be removed from the atmosphere at cost of 67-150 €/tCO<sub>2</sub> (80-180 USD/tCO<sub>2</sub>). Employing a land surface model simulating the effect of phosphorus release on ecosystem carbon sequestration, Goll et al. [31] find that cost of CDR on global hinterland alone through EW for removing 0.2-2.5 GtCO<sub>2</sub>/a is 83-417 €/tCO<sub>2</sub> (100-500 USD/tCO<sub>2</sub>). The discrepancy to above mentioned studies is explained by the higher application cost on remote hinterland compared to agricultural land [31].

### **Energy demand**

Rock handling, i.e., mining, crushing and grinding for EW is assumed to be similar to the rock handling for feedstock preparation for MIN<sub>EX</sub> (cf. sub-section 3.1.4 of the main study). However, while MIN<sub>EX</sub> requires additional energy for reactor operation and thermal feedstock pre-treatment, EW's energy demand beyond feedstock preparation is limited to the requirements for rock transportation and spreading. In this work, energy demand for rock spreading is assumed to be negligible compared to the energy demand for long distance transportation.

### **Accounting for soil pH**

Soil pH affects the weathering rates of applied rock [32]. Figure 1 shows the average soil pH level aggregated for the nine major regions considered within the present study. The original data contains information about the soil pH level in 0.05-degree spatial resolution. As can be seen, global average data in the major regions ranges from below 5.7 to above 7.5. A simple, non-weighted, average is chosen, as the effect of soil characteristics on the efficacy of EW should be studied in high spatial resolution in future work. As elaborated by Strefler et al. [32], this can lead to significant uncertainty in the weathering rates of dunite and basalt.

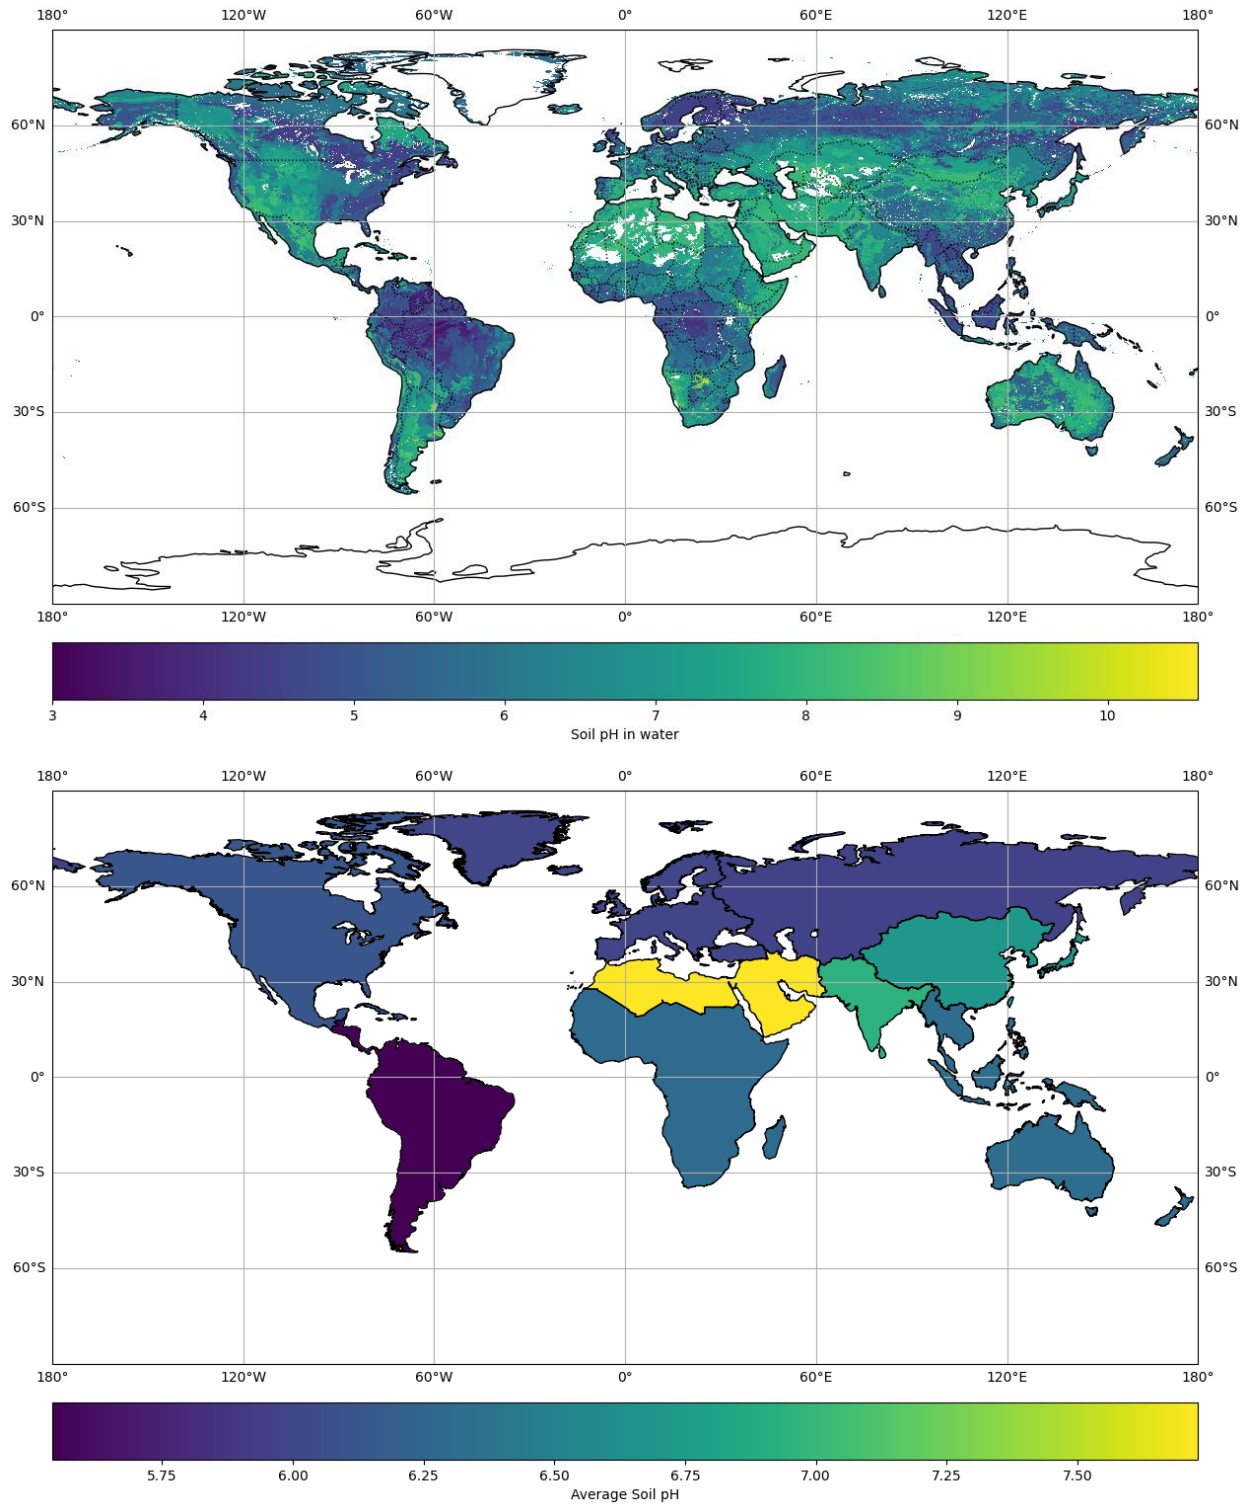

Figure 1: Average soil pH in water in 0.05-degree spatial resolution (top) and averaged for nine major regions (bottom). Please note the different ranges of the colourbar for better visualisation. Data is taken from [42].



## References

- [1] Snæbjörnsdóttir SÓ, Wiese F, Fridriksson T, Ármannsson H, Einarsson GM, Gislason SR. CO<sub>2</sub> storage potential of basaltic rocks in Iceland and the oceanic ridges. *Energy Procedia* 2014;63:4585–600. <https://doi.org/10.1016/j.egypro.2014.11.491>.
- [2] McGrail BP, Schaef HT, Ho AM, Chien Y-J, Dooley JJ, Davidson CL. Potential for carbon dioxide sequestration in flood basalts: SEQUESTRATION IN FLOOD BASALTS. *J Geophys Res Solid Earth* 2006;111:n/a-n/a. <https://doi.org/10.1029/2005JB004169>.
- [3] Oelkers EH, Gislason SR, Kelemen PB. Moving subsurface carbon mineral storage forward. *Carbon Capture Sci Technol* 2023;6:100098. <https://doi.org/10.1016/j.ccst.2023.100098>.
- [4] Goldberg D, Slagle AL. A global assessment of deep-sea basalt sites for carbon sequestration. *Energy Procedia* 2009;1:3675–82. <https://doi.org/10.1016/j.egypro.2009.02.165>.
- [5] Flett M, Beacher G, Brantjes J, Burt A, Dauth C, Koelmeyer F, et al. Gorgon Project: Subsurface Evaluation of Carbon Dioxide Disposal under Barrow Island. Days, Perth, Australia: SPE; 2008, p. SPE-116372-MS. <https://doi.org/10.2118/116372-MS>.
- [6] Rutqvist J, Vasco DW, Myer L. Coupled reservoir-geomechanical analysis of CO<sub>2</sub> injection and ground deformations at In Salah, Algeria. *Int J Greenh Gas Control* 2010;4:225–30. <https://doi.org/10.1016/j.ijggc.2009.10.017>.
- [7] Ringrose PS, Meckel TA. Maturing global CO<sub>2</sub> storage resources on offshore continental margins to achieve 2DS emissions reductions. *Sci Rep* 2019;9:17944. <https://doi.org/10.1038/s41598-019-54363-z>.
- [8] Blondes M, Merrill M, Anderson S, DeVera C. Carbon dioxide mineralization feasibility in the United States. Reston, VA: U.S. Geological Survey Scientific Investigations Report; 2019.
- [9] Wijaya N, Vikara D, Morgan D, Grant T, Remson D. Basin Management of Geologic CO<sub>2</sub> Storage: Effect of Well Spacing on CO<sub>2</sub> Plume and Pressure Interference. Day 1 Tue April 26 2022, Bakersfield, California, USA: SPE; 2022, p. D011S005R004. <https://doi.org/10.2118/209283-MS>.
- [10] Kelemen PB, McQueen N, Wilcox J, Renforth P, Dipple G, Vankeuren AP. Engineered carbon mineralization in ultramafic rocks for CO<sub>2</sub> removal from air: Review and new insights. *Chem Geol* 2020;550:119628. <https://doi.org/10.1016/j.chemgeo.2020.119628>.
- [11] Suleman Kali RF, Fan D, Hazel N, Striolo A. Techno-socio-economic analysis of geological carbon sequestration opportunities. *Environ Sci Adv* 2022;1:138–55. <https://doi.org/10.1039/D1VA00036E>.
- [12] Kristjánsdóttir H, Kristjánsdóttir S. CarbFix and SulFix in geothermal production, and the blue lagoon in Iceland: Grindvík urban settlement and volcanic activity. *Balt J Econ Stud* 2021;7:1–9. <https://doi.org/10.30525/2256-0742/2021-7-1-1-9>.
- [13] Gunnarsson I, Aradóttir ES, Oelkers EH, Clark DE, Arnarson MP, Sigfússon B, et al. The rapid and cost-effective capture and subsurface mineral storage of carbon and sulfur at the CarbFix2 site. *Int J Greenh Gas Control* 2018;79:117–26. <https://doi.org/10.1016/j.ijggc.2018.08.014>.
- [14] Snæbjörnsdóttir SÓ, Sigfússon B, Marieni C, Goldberg D, Gislason SR, Oelkers EH. Carbon dioxide storage through mineral carbonation. *Nat Rev Earth Environ* 2020;1:90–102. <https://doi.org/10.1038/s43017-019-0011-8>.

- [15] Myers C, Nakagaki T. Direct mineralization of atmospheric CO<sub>2</sub> using natural rocks in Japan. *Environ Res Lett* 2020;15:124018. <https://doi.org/10.1088/1748-9326/abc217>.
- [16] Myers CA, Nakagaki T, Akutsu K. Quantification of the CO<sub>2</sub> mineralization potential of ironmaking and steelmaking slags under direct gas-solid reactions in flue gas. *Int J Greenh Gas Control* 2019;87:100–11. <https://doi.org/10.1016/j.ijggc.2019.05.021>.
- [17] Renforth P. The negative emission potential of alkaline materials. *Nat Commun* 2019;10:1401. <https://doi.org/10.1038/s41467-019-09475-5>.
- [18] Pan S-Y, Chen Y-H, Fan L-S, Kim H, Gao X, Ling T-C, et al. CO<sub>2</sub> mineralization and utilization by alkaline solid wastes for potential carbon reduction. *Nat Sustain* 2020;3:399–405. <https://doi.org/10.1038/s41893-020-0486-9>.
- [19] Strunge T, Renforth P, Van der Spek M. Towards a business case for CO<sub>2</sub> mineralisation in the cement industry. *Commun Earth Environ* 2022;3:59. <https://doi.org/10.1038/s43247-022-00390-0>.
- [20] Benhelal E, Rashid MI, Holt C, Rayson MS, Brent G, Hook JM, et al. The utilisation of feed and byproducts of mineral carbonation processes as pozzolanic cement replacements. *J Clean Prod* 2018;186:499–513. <https://doi.org/10.1016/j.jclepro.2018.03.076>.
- [21] Rosa L, Becattini V, Gabrielli P, Andreotti A, Mazzotti M. Carbon dioxide mineralization in recycled concrete aggregates can contribute immediately to carbon-neutrality. *Resour Conserv Recycl* 2022;184:106436. <https://doi.org/10.1016/j.resconrec.2022.106436>.
- [22] Ostovari H, Kuhrmann L, Mayer F, Minten H, Bardow A. Towards a European supply chain for CO<sub>2</sub> capture, utilization, and storage by mineralization: Insights from cost-optimal design. *J CO<sub>2</sub> Util* 2023;72:102496. <https://doi.org/10.1016/j.jcou.2023.102496>.
- [23] Ostovari H, Müller L, Skocek J, Bardow A. From Unavoidable CO<sub>2</sub> Source to CO<sub>2</sub> Sink? A Cement Industry Based on CO<sub>2</sub> Mineralization. *Environ Sci Technol* 2021;55:5212–23. <https://doi.org/10.1021/acs.est.0c07599>.
- [24] Ostovari H, Müller L, Mayer F, Bardow A. A climate-optimal supply chain for CO<sub>2</sub> capture, utilization, and storage by mineralization. *J Clean Prod* 2022;360:131750. <https://doi.org/10.1016/j.jclepro.2022.131750>.
- [25] Faber G, Ruttiger A, Strunge T, Langhorst T, Zimmermann A, van der Hulst M, et al. Adapting Technology Learning Curves for Prospective Techno-Economic and Life Cycle Assessments of Emerging Carbon Capture and Utilization Pathways. *Front Clim* 2022;4:820261. <https://doi.org/10.3389/fclim.2022.820261>.
- [26] Rubin ES, Azevedo IML, Jaramillo P, Yeh S. A review of learning rates for electricity supply technologies. *Energy Policy* 2015;86:198–218. <https://doi.org/10.1016/j.enpol.2015.06.011>.
- [27] Gerdemann SJ, O'Connor WK, Dahlin DC, Penner LR, Rush H. Ex Situ Aqueous Mineral Carbonation. *Environ Sci Technol* 2007;41:2587–93. <https://doi.org/10.1021/es0619253>.
- [28] Olajire AA. A review of mineral carbonation technology in sequestration of CO<sub>2</sub>. *J Pet Sci Eng* 2013;109:364–92. <https://doi.org/10.1016/j.petrol.2013.03.013>.
- [29] Geerlings H, Zevenhoven R. CO<sub>2</sub> Mineralization—Bridge Between Storage and Utilization of CO<sub>2</sub>. *Annu Rev Chem Biomol Eng* 2013;4:103–17. <https://doi.org/10.1146/annurev-chembioeng-062011-080951>.
- [30] Beerling DJ, Kantzas EP, Lomas MR, Wade P, Eufrazio RM, Renforth P, et al. Potential for large-scale CO<sub>2</sub> removal via enhanced rock weathering with croplands. *Nature* 2020;583:242–8. <https://doi.org/10.1038/s41586-020-2448-9>.

- [31] Goll DS, Ciais P, Amann T, Buermann W, Chang J, Eker S, et al. Potential CO<sub>2</sub> removal from enhanced weathering by ecosystem responses to powdered rock. *Nat Geosci* 2021;14:545–9. <https://doi.org/10.1038/s41561-021-00798-x>.
- [32] Streffler J, Amann T, Bauer N, Kriegler E, Hartmann J. Potential and costs of carbon dioxide removal by enhanced weathering of rocks. *Environ Res Lett* 2018;13:034010. <https://doi.org/10.1088/1748-9326/aaa9c4>.
- [33] [USDOE] - U.S. Department of Energy. Mining Industry Energy Bandwidth Study. 2007. <https://doi.org/10.2172/1218653>.
- [34] Teir S, Eloneva S, Fogelholm C-J, Zevenhoven R. Fixation of carbon dioxide by producing hydromagnesite from serpentinite. *Appl Energy* 2009;86:214–8. <https://doi.org/10.1016/j.apenergy.2008.03.013>.
- [35] Veetil SP, Hitch M. Recent developments and challenges of aqueous mineral carbonation: a review. *Int J Environ Sci Technol* 2020;17:4359–80. <https://doi.org/10.1007/s13762-020-02776-z>.
- [36] Wang F, Dreisinger DB, Jarvis M, Hitchins T. The technology of CO<sub>2</sub> sequestration by mineral carbonation: current status and future prospects. *Can Metall Q* 2018;57:46–58. <https://doi.org/10.1080/00084433.2017.1375221>.
- [37] Oconnor W, D.C. Dahlin, G.E. Rush, S.J. Gerdemann, L.R. Penner, D.N. Nilsen. Aqueous Mineral Carbonation: Mineral Availability, Pretreatment, Reaction Parametrics, and Process Studies 2005. <https://doi.org/10.13140/RG.2.2.23658.31684>.
- [38] Zevenhoven R, Slotte M, Åbacka J, Highfield J. A comparison of CO<sub>2</sub> mineral sequestration processes involving a dry or wet carbonation step. *Energy* 2016;117:604–11. <https://doi.org/10.1016/j.energy.2016.05.066>.
- [39] Huijgen WJJ, Ruijg GJ, Comans RNJ, Witkamp G-J. Energy Consumption and Net CO<sub>2</sub> Sequestration of Aqueous Mineral Carbonation. *Ind Eng Chem Res* 2006;45:9184–94. <https://doi.org/10.1021/ie060636k>.
- [40] Ostovari H, Sternberg A, Bardow A. Rock 'n' use of CO<sub>2</sub>: carbon footprint of carbon capture and utilization by mineralization. *Sustain Energy Fuels* 2020;4:4482–96. <https://doi.org/10.1039/D0SE00190B>.
- [41] Eikeland E, Blichfeld AB, Tyrsted C, Jensen A, Iversen BB. Optimized Carbonation of Magnesium Silicate Mineral for CO<sub>2</sub> Storage. *ACS Appl Mater Interfaces* 2015;7:5258–64. <https://doi.org/10.1021/am508432w>.
- [42] Wieder, W.R., J. Boehmert, G.B. Bonan, and M. Langseth. 2014. RegridDED Harmonized World Soil Database v1.2. Data set. Available on-line [<http://daac.ornl.gov>] from Oak Ridge National Laboratory Distributed Active Archive Center, Oak Ridge, Tennessee, USA. <http://dx.doi.org/10.3334/ORNLDAAC/1247> .
