# Supplementary material for: Techno-economic insights and deployment prospects of permanent carbon dioxide sequestration in solid carbonates
Source: Royal Society of Chemistry journal article supplement (doi:10.1039/d4ee03166k), 2024-01-01
Supplement: d4ee03166k2.xlsx [file d4ee03166k2.xlsx]

## Sheet: SM2
Supplementary material 2
Techno-economic insights and deployment prospects of permanent carbon dioxide sequestration in solid carbonates
Andreas Mühlbauer1,2, Dominik Keiner2,*, Christian Breyer2,*
1 Dept. Of Civil and Environmental Engineering, Stanford University, Stanford, CA, 94305, US
2 School of Energy Systems, LUT University, Yliopistonkatu 34, 53850 Lappeenranta, Finland
* Corresponding authors: dominik.keiner@lut.fi, christian.breyer@lut.fi
Contents
Sheet	Explanation
Results
OverviewResults	Overview and result figures for final energy demand, primary energy demand and levelised cost of CDR (LCOCDR).
TotalCost&Energy	Calculations and results for energy demand and levelised cost compared to projections for total primary energy demand and gross domestic product.
Calculations/Methods
Global	Global assumptions for this work.
MININ	Cost and energy calculations for in-situ mineralisation.
MINEX	Cost and energy calculations for ex-situ mineralisation.
EW	Cost and energy calculations for enhanced weathering.
DAC	Cost and energy calculations for direct air carbon dioxide capture.
Heat Pump	Cost and energy calculations for heat pumps.
MININ_Pot	Aggregation and harmonisation of data on the potential of in-situ mineralisation.
MINEX_IW_Pot	Aggregation and harmonisation of data on the potential of ex-situ mineralisation using industrial solid waste.
EW_Pot	Aggregation and harmonisation of data on the potential of enhanced weathering.
Mining	Cost and energy calculations for rock mining.
Transport	Cost and energy calculations for rock transportation.
Comminution	Cost and energy calculations for rock comminution.
Rock Handling	Energy calculations for rock handling for enhanced weathering.
Conversion	Conversion factors for inflation correction.
Learning	Learning rate approach for technologies (considered only of ex-situ mineralisation).
References
References	References considered for this supplementary material.

## Sheet: References
	Author	Year	Title	DOI
	Anthonsen	2013	CO2 Storage Potential in the Nordic Region	https://doi.org/10.1016/j.egypro.2013.06.421
	Bogdanov	2021	Low-cost renewable electricity as the key driver of the global energy transition towards sustainability	https://doi.org/10.1016/j.energy.2021.120467
	Bremen	2022	Direct Olivine Carbonation: Optimal Process Design for aLowEmission and Cost-Efficient Cement Production	https://doi.org/10.1021/acs.iecr.2c00984
	Callow	2018	Assessing the carbon sequestration potential of basalt using X-ray micro-CT and rock mechanics	https://doi.org/10.1016/j.ijggc.2017.12.008
	Faber	2022	Adapting Technology Learning Curves for Prospective Techno-Economic and Life Cycle Assessments of Emerging Carbon Capture and Utilization Pathways	https://doi.org/10.3389/fclim.2022.820261
	Galimova	2022	Global demand analysis for carbon dioxide as raw material from key industrial sources and direct air capture to produce renewable electricity-based fuels and chemicals	https://doi.org/10.1016/j.jclepro.2022.133920
	Goldberg	2008	Carbon dioxide sequestration in deep-sea basalt	https://doi.org/10.1073/pnas.0804397105
	Goldberg	2009	A global assessment of deep-sea basalt sites for carbon sequestration	https://doi.org/10.1016/j.egypro.2009.02.165
	Guo	2021	Forecasting mining capital cost for open-pit mining projects based on artificial neural network approach	https://doi.org/10.1016/j.resourpol.2019.101474
	IEAGHG	2013	The Costs of CO2 storage	https://www.globalccsinstitute.com/archive/hub/publications/119816/costs-co2-storage-post-demonstration-ccs-eu.pdf
	Kelemen	2020	Engineered carbon mineralization in ultramafic rocks for CO2 removal from air: Review and new insights	https://doi.org/10.1016/j.chemgeo.2020.119628
	Kelemen	2019	An Overview of the Status and Challenges of CO2 Storage in Minerals and Geological Formations	https://doi.org/10.3389/fclim.2019.00009
	Kremer	2019	Geological Mapping and Characterization of Possible Primary Input Materials for the Mineral Sequestration of Carbon Dioxide in Europe	https://doi.org/10.3390/min9080485
	Manjong	2021	Setting the Pace for a Sustainable Energy Transition in Central Africa: The Case of Cameroon	https://doi.org/10.1109/ACCESS.2021.3121000
	McGrail	2006	Potential for carbon dioxide sequestration in flood basalts	https://doi.org/10.1029/2005JB004169
	Mühlbauer	2024	Assessment of technologies and economics for carbon dioxide removal from a portfolio perspective	submitted
	Narharisetti	2019	New classification of CO2 mineralization processes and economic evaluation	https://doi.org/10.1016/j.rser.2018.10.008
	Oelkers	2023	Moving subsurface carbon mineral storage forward	https://doi.org/10.1016/j.ccst.2023.100098
	Ostovari	2020	Rock ‘n’ use of CO2: carbon footprint of carbon capture and utilization by mineralization	https://doi.org/10.1039/D0SE00190B
	Ostovari	2022	A climate-optimal supply chain for CO2 capture, utilization, and storage by mineralization	https://doi.org/10.1016/j.jclepro.2022.131750
	Satymov	2022	Global-local analysis of cost-optimal onshore wind turbine configurations considering wind classes and hub heights	https://doi.org/10.1016/j.energy.2022.124629
	Snaebjoernsdottir	2020	Carbon dioxide storage through mineral carbonation	https://doi.org/10.1038/s43017-019-0011-8
	Strefler	2018	Potential and costs of carbon dioxide removal by enhanced weathering of rocks	https://doi.org/10.1088/1748-9326/aaa9c4
	Strunge	2022	Towards a business case for CO2 mineralisation in the cement industry	https://doi.org/10.1038/s43247-022-00390-0
	Vishal	2021	A systematic capacity assessment and classification of geologic CO2 storage systems in India	https://doi.org/10.1016/j.ijggc.2021.103458

## Sheet: Global
			2020	2025	2030	2035	2040	2045	2050	2055	2060	2065	2070	2075	2080	2085	2090	2095	2100		electricity cost
	WACC	-	0.07	0.07	0.07	0.07	0.07	0.07	0.07	0.07	0.07	0.07	0.07	0.07	0.07	0.07	0.07	0.07	0.07		The method for electricity cost had been the following:
	Availability if not further stated	-	0.9	0.91	0.92	0.93	0.94	0.95	0.95	0.95	0.95	0.95	0.95	0.95	0.95	0.95	0.95	0.95	0.95		Bogdanov et al. (2021) is the basis https://www.sciencedirect.com/science/article/pii/S0360544221007167
	Electricity cost	€/MWh,el	41.3	41.3	41.3	39.15	37	26.95	16.9	16.25	15.6	14.95	14.3	14.3	14.3	14.3	14.3	14.3	14.3		this has been recalculated with latest cost assumptions (PV system, batteries), as used for instance in Manjong et al. (2021): https://ieeexplore.ieee.org/document/9579016
																					this was the basis of this recently submitted paper of Galimova et al. (2022) Global trading of renewable electricity-based fuels and chemicals to enhance the energy transition across all sectors towards sustainability, submitted
																					then the wind FLh are adjusted according to the findings of Satymov et al. (2022) https://www.sciencedirect.com/science/article/pii/S0360544222015328
	In-situ mineralisation onshore																				that finally delivers the numbers as highlighted in green
	In-situ mineralisation offshore																				do we need numbers earlier than 2030 for CDR? most likely not
	Ex-situ mineralisation industrial waste																				values for 2035 and 2045 to be interpolated
	Ex-situ mineralisation mined rocks																				then we know that the cost beyond 2050 further decline due to the full cost assumptions of 2050 since other higher cost options are phased out, that effect is about 15%, and that is fully effective around 2070, thus, the periods 2055, 2060, 2065 to be interpolated between the values of 2050 and 2070
	Buffered accelerated weathering of limestone																				beyond 2070 let’s use the 2070 value
	Enhanced weathering
	Carbonates	∂G
	C	0
	CO₂	-394.39
	CaCO₃	-1129.1
	MgCO₃	-1012.1

## Sheet: TotalCost&Energy
		2020	2025	2030	2035	2040	2045	2050	2055	2060	2065	2070	2075	2080	2085	2090	2095	2100
	CDR Demand for 1.0°C [GtCO2/a]	0.0011	0.0047	0.0213	0.0951	0.4226	1.8241	7.0164	19.2308	31.4452	36.6375	38.039	38.3664	38.4403	38.4568	38.4605	38.4613	38.4615
	CDR Demand for 1.5°C [GtCO2/a]	0.0003	0.0014	0.0061	0.0272	0.1207	0.5212	2.0047	5.4945	8.9843	10.4679	10.8683	10.9618	10.9829	10.9877	10.9887	10.9889	10.989
Share	in-situ, onshore	0.2	0.2	0.2	0.2	0.2	0.2	0.2	0.2	0.2	0.2	0.2	0.2	0.2	0.2	0.2	0.2	0.2
	in-situ, offshore	0.2	0.2	0.2	0.2	0.2	0.2	0.2	0.2	0.2	0.2	0.2	0.2	0.2	0.2	0.2	0.2	0.2
	ex-situ, serpentine	0.033	0.033	0.033	0.033	0.033	0.033	0.033	0.033	0.033	0.033	0.033	0.033	0.033	0.033	0.033	0.033	0.033
	ex-situ, olivine	0.033	0.033	0.033	0.033	0.033	0.033	0.033	0.033	0.033	0.033	0.033	0.033	0.033	0.033	0.033	0.033	0.033
	ex-situ, waste	0.033	0.033	0.033	0.033	0.033	0.033	0.033	0.033	0.033	0.033	0.033	0.033	0.033	0.033	0.033	0.033	0.033
	EW	0.1	0.1	0.1	0.1	0.1	0.1	0.1	0.1	0.1	0.1	0.1	0.1	0.1	0.1	0.1	0.1	0.1
Cost [€/tCO2]	in-situ, onshore			122.572				45.6803				39.2896
	in-situ, offshore			130.517				53.3745				46.9839
	ex-situ, serpentine			187.98				83.7336				73.8577
	ex-situ, olivine			188.526				82.9783				72.9979
	ex-situ, waste			182.091				71.4929				60.9743
	EW			87.7165				67.7564				65.6295
Primary energy demand [MWh/tCO2]	in-situ, onshore			1.09657				0.749062				0.694685
	in-situ, offshore			1.09657				0.749062				0.694685
	ex-situ, serpentine			3.17368				2.78732				2.73276
	ex-situ, olivine			2.79768				2.41969				2.36517
	ex-situ, waste			2.12186				1.77435				1.71997
	EW			1.15358				1.11472				1.11454
1.0°C pathway	Total cost [b€/a]			1.65763				241.696				1166.89
	Total primary energy demand [PWh/a]			0.0174886				4.50089				23.3681
1.5°C pathway	Total cost [b€/a]			0.474721				69.0566				333.396
	Total primary energy demand [PWh/a]			0.00500847				1.28598				6.6766
Total GDP projection - LUT DEES	GDP projection [b€/a] x CDR	107158	133619	165131	201836	243578	290084	340827	395012	451583	509284	566658	622150	674378	722209	764913	801952	833049
Total Primary Energy demand projection - LUT DEES	TPED projection [PWh/a] x CDR	173.277	192.338	197.358	197.515	193.871	190.316	192.375	211.117	231.456	251.959	271.665	289.877	306.156	320.31	332.324	342.208	349.97
Results as share of GDP or Total primary energy demand
1.0°C pathway	Total cost [% in GDP]			1.00383e-05				0.000709147				0.00205924
	Total primary energy demand [additional % GDP]			8.86134e-05				0.0233964				0.086018
1.5°C pathway	Total cost [% in GDP]			2.87482e-06				0.000202615				0.000588356
	Total primary energy demand [additional % GDP]			2.53776e-05				0.00668475				0.0245766
				Temperature trajectory	2050	2070
	Results table	Cost	Total cost [b€/a]	1.5°C	69.0566	333.396
				1.0°C	241.696	1166.89
			Share in projected GDP [%]	1.5°C	0.000202615	0.000588356
				1.0°C	0.000709147	0.00205924
		Energy	Total primary energy demand [PWh/a]	1.5°C	1.28598	6.6766
				1.0°C	4.50089	23.3681
			Share in projected total primary energy demand [%]	1.5°C	0.00668475	0.0245766
				1.0°C	0.0233964	0.086018

## Sheet: SensitivityAnalysis
Sensitvity - Cost
	MININ
	Capex	167.569
	18.7066
	37.4132
	56.1198
Sensitivity - Potential
	MININ

## Sheet: OverviewResults
				w/o Energy	Energy	DAC	W Energy	w/ Energy & DAC
		2030	in-situ, onshore	4.89973	2.6292	115.043	7.52892	122.572
			in-situ, offshore	12.7384	2.73571	115.043	15.4741	130.517
			ex-situ, serpentine	40.7734	32.1642	115.043	72.9376	187.98
			ex-situ, olivine	40.7734	32.7096	115.043	73.483	188.526
			ex-situ, waste	25.7897	41.2587	115.043	67.0484	182.091
			EW	87.7165	0	0	87.7165	87.7165
		2050	in-situ, onshore	4.64185	1.15596	39.8824	5.79781	45.6803
			in-situ, offshore	12.3361	1.15596	39.8824	13.4921	53.3745
			ex-situ, serpentine	29.711	14.1401	39.8824	43.8511	83.7336
			ex-situ, olivine	29.711	13.3848	39.8824	43.0958	82.9783
			ex-situ, waste	14.7273	16.8831	39.8824	31.6104	71.4929
			EW	67.7564	0	0	67.7564	67.7564
		2070	in-situ, onshore	4.64185	0.97812	33.6696	5.61997	39.2896
			in-situ, offshore	12.3361	0.97812	33.6696	13.3142	46.9839
			ex-situ, serpentine	28.0027	12.1854	33.6696	40.188	73.8577
			ex-situ, olivine	28.0027	11.3256	33.6696	39.3283	72.9979
			ex-situ, waste	13.019	14.2857	33.6696	27.3047	60.9743
			EW	65.6295	0	0	65.6295	65.6295
		Primary Energy Demand [kWh/tCO2]
				Feedstock handling	Carbonation process	DAC	Electricity: FE -> PE Factor [Mühlbauer 2023]	Total PE
		2030	in-situ, onshore	0	79.6341	1016.93	0.904135	1.09657
			in-situ, offshore	0	79.6341	1016.93	0.904135	1.09657
			ex-situ, serpentine	1153.58	1003.17	1016.93	0.904135	3.17368
			ex-situ, olivine	904.772	875.975	1016.93	0.904135	2.79768
			ex-situ, waste	0	1104.92	1016.93	0.904135	2.12186
			EW	1153.58	0	0	0.904135	1.15358
		2050	in-situ, onshore	0	79.6341	669.428	0.935656	0.749062
			in-situ, offshore	0	79.6341	669.428	0.935656	0.749062
			ex-situ, serpentine	1114.72	1003.17	669.428	0.935656	2.78732
			ex-situ, olivine	874.291	875.975	669.428	0.935656	2.41969
			ex-situ, waste	0	1104.92	669.428	0.935656	1.77435
			EW	1114.72	0	0	0.935656	1.11472
		2070	in-situ, onshore	0	79.6341	615.051	0.935811	0.694685
			in-situ, offshore	0	79.6341	615.051	0.935811	0.694685
			ex-situ, serpentine	1114.54	1003.17	615.051	0.935811	2.73276
			ex-situ, olivine	874.147	875.975	615.051	0.935811	2.36517
			ex-situ, waste	0	1104.92	615.051	0.935811	1.71997
			EW	1114.54	0	0	0.935811	1.11454
		Final energy demand [kWh/tCO2]		Heat LT	Heat MT	Electricity	Total
		2030	in-situ, onshore	1500	0	297	1.797
			in-situ, offshore	1500	0	297	1.797
			ex-situ, serpentine	1500	452	1723	3.675
			ex-situ, olivine	1500	103	1732.04	3.33504
			ex-situ, waste	1500	407	817	2.724
			EW	0	0	1043	1.043
		2050	in-situ, onshore	1102	0	254	1.356
			in-situ, offshore	1102	0	254	1.356
			ex-situ, serpentine	1102	452	1680	3.234
			ex-situ, olivine	1102	103	1689.04	2.89404
			ex-situ, waste	1102	407	774	2.283
			EW	0	0	1043	1.043
		2070	in-situ, onshore	1102	0	254	1.356
			in-situ, offshore	1102	0	254	1.356
			ex-situ, serpentine	1102	452	1680	3.234
			ex-situ, olivine	1102	103	1689.04	2.89404
			ex-situ, waste	1102	407	774	2.283
			EW	0	0	1043	1.043
		Electricity demand feedstock handling
		Mining	5.23	kWh/tRock
		Transport	1.38	kWh/tRock/km
		Transport distance	200	km		1
		Transport	276	kWh/tRock
		Comminution	127.788	kWh/tRock
		Total	409.018	kWh/tRock
		Feedstock demand	2.55	tRock/tCO2	Serpentine
		Feedstock demand	2	tRock/tCO2	Olivine
		Total Serpentine	1043	kWh/tCO2	Serpentine
		Total Olivine	818.036	kWh/tCO2	Olivine
		Sensitivity analysis			Sensitivity analysis - distance for EW - serpentine
		EW			EW
		Distance	Electricity demand			1043		km distance	absolute energy demand
		100	691.096		1	691.096	0.662607	100	691.096
		200	1043		2	1043	1	200	1043
		300	1394.9		3	1394.9	1.33739	300	1394.9
		400	1746.8		4	1746.8	1.67479	400	1746.8
		500	2098.7		5	2098.7	2.01218	500	2098.7

## Sheet: MININ
									WACC	-	0.07	0.07	0.07	0.07	0.07	0.07	0.07	0.07	0.07	0.07	0.07	0.07	0.07	0.07	0.07	0.07	0.07
									Availability	-	0.9	0.91	0.92	0.93	0.94	0.95	0.95	0.95	0.95	0.95	0.95	0.95	0.95	0.95	0.95	0.95	0.95
									Electricity cost	€/MWh	41.3	41.3	41.3	39.15	37	26.95	16.9	16.25	15.6	14.95	14.3	14.3	14.3	14.3	14.3	14.3	14.3
									Heat,HP @100°C cost	€/MWh	31.3078	30.4162	29.5856	27.8497	23.9196	19.2005	14.2712	13.8044	13.3658	12.953	12.5638	12.5638	12.5638	12.5638	12.5638	12.5638	12.5638
									Heat,HT cost	€/MWh	41.3	41.3	41.3	39.15	37	26.95	16.9	16.25	15.6	14.95	14.3	14.3	14.3	14.3	14.3	14.3	14.3
		MININ,ON							MININ,ON
	Sensitivity multiplier	Objective	Original Unit	Original Value	Unit	Value	Reference		Objective	Unit	2020	2025	2030	2035	2040	2045	2050	2055	2060	2065	2070	2075	2080	2085	2090	2095	2100
	1	Capex	€[2013]/(tCO2/a)	35	€[2020]/(tCO2/a)	37.4132	IEAGHG 2013		Capex	€[2020]/(tCO2/a)	37.4132	37.4132	37.4132	37.4132	37.4132	37.4132	37.4132	37.4132	37.4132	37.4132	37.4132	37.4132	37.4132	37.4132	37.4132	37.4132	37.4132
	1	Opexfix	€[2013]/tCO2	1.5	€[2020]/tCO2	1.60342	IEAGHG 2013		Opexfix	€[2020]/tCO2	1.60342	1.60342	1.60342	1.60342	1.60342	1.60342	1.60342	1.60342	1.60342	1.60342	1.60342	1.60342	1.60342	1.60342	1.60342	1.60342	1.60342
		Opexvar	€[2013]/tCO2	0	€[2020]/tCO2	0	IEAGHG 2013		Opexvar	€[2020]/tCO2	0	0	0	0	0	0	0	0	0	0	0	0	0	0	0	0	0
	1	Lifetime	a	40	a	40	IEAGHG 2013		Lifetime	a	40	40	40	40	40	40	40	40	40	40	40	40	40	40	40	40	40
		FLH	h		h				FLH	h	7884	7971.6	8059.2	8146.8	8234.4	8322	8322	8322	8322	8322	8322	8322	8322	8322	8322	8322	8322
		Carbon eff	-	1	-	1			Carbon eff	-	1	1	1	1	1	1	1	1	1	1	1	1	1	1	1	1	1
									crf	-	0.0750091	0.0750091	0.0750091	0.0750091	0.0750091	0.0750091	0.0750091	0.0750091	0.0750091	0.0750091	0.0750091	0.0750091	0.0750091	0.0750091	0.0750091	0.0750091	0.0750091
		Energy balance							LCO w/o energy	€[2020]/tCO2	4.89973	4.84588	4.79321	4.74167	4.69123	4.64185	4.64185	4.64185	4.64185	4.64185	4.64185	4.64185	4.64185	4.64185	4.64185	4.64185	4.64185
	1	Electricity,in	MWh,el/tCO2	0.072	MWh,el/tCO2	0.072	Snaebjoernsdottir 2020		Electricity,in	€[2020]/tCO2	2.9736	2.9736	2.9736	2.8188	2.664	1.9404	1.2168	1.17	1.1232	1.0764	1.0296	1.0296	1.0296	1.0296	1.0296	1.0296	1.0296
		Heat,in	MWh,th/tCO2	0	MWh,th/tCO2	0			Heat,in	€[2020]/tCO2	0	0	0	0	0	0	0	0	0	0	0	0	0	0	0	0	0
		Heat,out	MWh,th/tCO2	0	MWh,th/tCO2	0			Heat,out	€[2020]/tCO2	0	0	0	0	0	0	0	0	0	0	0	0	0	0	0	0	0
		Mass balance							LCO w/ Energy	€[2020]/tCO2	7.57597	7.55186	7.52892	7.36315	7.19539	6.48523	5.79781	5.75335	5.70889	5.66443	5.61997	5.61997	5.61997	5.61997	5.61997	5.61997	5.61997
		Water,in	m3/tCO2	22	m3/tCO2	22	Snaebjoernsdottir 2020		Water,in	m3/tCO2	22	22	22	22	22	22	22	22	22	22	22	22	22	22	22	22	22
									LCO w/ DAC	€[2020]/tCO2	167.569	156.356	122.572	106.308	74.254	60.6677	45.6803	42.9341	41.1283	40.1121	39.2896	39.0385	38.6701	38.1876	37.7843	37.6129	37.5051
		MININ,OFF							MININ,OFF
		Objective	Original Unit	Original Value	Unit	Value	Reference		Objective	Unit	2020	2025	2030	2035	2040	2045	2050	2055	2060	2065	2070	2075	2080	2085	2090	2095	2100
		Capex	€[2013]/(tCO2/a)	99.5	€[2020]/(tCO2/a)	106.36	IEAGHG 2013		Capex	€[2020]/(tCO2/a)	106.36	106.36	106.36	106.36	106.36	106.36	106.36	106.36	106.36	106.36	106.36	106.36	106.36	106.36	106.36	106.36	106.36
		Opexfix	€[2013]/tCO2	3.5	€[2020]/tCO2	3.74132	IEAGHG 2013		Opexfix	€[2020]/tCO2	3.74132	3.74132	3.74132	3.74132	3.74132	3.74132	3.74132	3.74132	3.74132	3.74132	3.74132	3.74132	3.74132	3.74132	3.74132	3.74132	3.74132
		Opexvar	€[2013]/tCO2	0	€[2020]/tCO2	0	IEAGHG 2013		Opexvar	€[2020]/tCO2	0	0	0	0	0	0	0	0	0	0	0	0	0	0	0	0	0
		Lifetime	a	40	a	40	IEAGHG 2013		Lifetime	a	40	40	40	40	40	40	40	40	40	40	40	40	40	40	40	40	40
		FLH	h		h				FLH	h	7884	7971.6	8059.2	8146.8	8234.4	8322	8322	8322	8322	8322	8322	8322	8322	8322	8322	8322	8322
		Carbon eff	-	1	-	1			Carbon eff	-	1	1	1	1	1	1	1	1	1	1	1	1	1	1	1	1	1
									crf	-	0.0750091	0.0750091	0.0750091	0.0750091	0.0750091	0.0750091	0.0750091	0.0750091	0.0750091	0.0750091	0.0750091	0.0750091	0.0750091	0.0750091	0.0750091	0.0750091	0.0750091
		Energy balance							LCO w/o energy	€[2020]/tCO2	13.0215	12.8784	12.7384	12.6014	12.4674	12.3361	12.3361	12.3361	12.3361	12.3361	12.3361	12.3361	12.3361	12.3361	12.3361	12.3361	12.3361
		Electricity,in	MWh,el/tCO2	0.072	MWh,el/tCO2	0.072	Snaebjoernsdottir 2020		Electricity,in	€[2020]/tCO2	2.9736	2.9736	2.9736	2.8188	2.664	1.9404	1.2168	1.17	1.1232	1.0764	1.0296	1.0296	1.0296	1.0296	1.0296	1.0296	1.0296
		Heat,in	MWh,th/tCO2	0	MWh,th/tCO2	0			Heat,in	€[2020]/tCO2	0	0	0	0	0	0	0	0	0	0	0	0	0	0	0	0	0
		Heat,out	MWh,th/tCO2	0	MWh,th/tCO2	0			Heat,out	€[2020]/tCO2	0	0	0	0	0	0	0	0	0	0	0	0	0	0	0	0	0
		Mass balance							LCO w/ Energy	€[2020]/tCO2	15.6977	15.5843	15.4741	15.2229	14.9715	14.1795	13.4921	13.4476	13.4032	13.3587	13.3142	13.3142	13.3142	13.3142	13.3142	13.3142	13.3142
		Water,in	m3/tCO2	22	m3/tCO2	22	Snaebjoernsdottir 2020		Water,in	m3/tCO2	22	22	22	22	22	22	22	22	22	22	22	22	22	22	22	22	22
									LCO w/ DAC	€[2020]/tCO2	175.69	164.388	130.517	114.168	82.0301	68.362	53.3745	50.6284	48.8226	47.8064	46.9839	46.7327	46.3644	45.8819	45.4786	45.3071	45.1994
Sensitivity - total cost
	Capex						Opexfix						Lifetime						Electricity demand
		MININ,ON	MININ,OFF					MININ,ON	MININ,OFF					MININ,ON	MININ,OFF					MININ,ON	MININ,OFF
		167.569	175.69					167.569	175.69					167.569	175.69					167.569	175.69
	0.5	166.009	171.258	0.990696	0.974773		0.5	166.678	173.612	0.994684	0.988169		0.5	168.374	177.981	1.00481	1.01304		0.5	166.23	174.352	0.992014	0.992384
	0.75	166.789	173.474	0.995348	0.987386		0.75	167.123	174.651	0.997342	0.994085		0.75	167.8	176.349	1.00138	1.00375		0.75	166.899	175.021	0.996007	0.996192
	1	167.569	175.69	1	1		1	167.569	175.69	1	1		1	167.569	175.69	1	1		1	167.569	175.69	1	1
	1.25	168.348	177.906	1.00465	1.01261		1.25	168.014	176.73	1.00266	1.00592		1.25	167.463	175.389	0.999368	0.998285		1.25	168.238	176.359	1.00399	1.00381
	1.5	169.128	180.122	1.0093	1.02523		1.5	168.459	177.769	1.00532	1.01183		1.5	167.411	175.244	0.999062	0.997457		1.5	168.907	177.028	1.00799	1.00762

## Sheet: MINEX
									WACC	-	0.07	0.07	0.07	0.07	0.07	0.07	0.07	0.07	0.07	0.07	0.07	0.07	0.07	0.07	0.07	0.07	0.07
									Availability	-	0.9	0.91	0.92	0.93	0.94	0.95	0.95	0.95	0.95	0.95	0.95	0.95	0.95	0.95	0.95	0.95	0.95
									Electricity cost	€/MWh	41.3	41.3	41.3	39.15	37	26.95	16.9	16.25	15.6	14.95	14.3	14.3	14.3	14.3	14.3	14.3	14.3
									Heat,HP @100°C cost	€/MWh	31.3078	30.4162	29.5856	27.8497	23.9196	19.2005	14.2712	13.8044	13.3658	12.953	12.5638	12.5638	12.5638	12.5638	12.5638	12.5638	12.5638
									Heat,HT cost	€/MWh	41.3	41.3	41.3	39.15	37	26.95	16.9	16.25	15.6	14.95	14.3	14.3	14.3	14.3	14.3	14.3	14.3
									Rock handling	€/tRock	31.269	31.269	31.269	30.3896	29.5102	25.3996	21.2889	21.0231	20.7572	20.4913	20.2255	20.2255	20.2255	20.2255	20.2255	20.2255	20.2255
	For sensitivity	MINEX,Serpentine											1	2	3	4	5	6	7	8	9
		Objective	Original Unit	Original Value	Unit	Value	Reference		Objective	Unit	2020	2025	2030	2035	2040	2045	2050	2055	2060	2065	2070	2075	2080	2085	2090	2095	2100
	1	Capex	€[2022]/(tCO2/a)	234.16	€[2020]/(tCO2/a)	208.412	Faber 2022, Strunge 2022		Capex	€[2020]/tCO2	18.2386	18.2386	18.2386	14.3332	11.2761	8.9125	7.17617	6.10184	5.63781	5.50092	5.4678	5.46027	5.45858	5.4582	5.45812	5.4581	5.4581
	1	Opexfix	€[2022]/tCO2	0.03	€[2020]/tCO2	6.25237	Faber 2022, Strunge 2022		Opexfix	€[2020]/tCO2	7.55117	7.55117	7.55117	7.55117	7.55117	7.55117	7.55117	7.55117	7.55117	7.55117	7.55117	7.55117	7.55117	7.55117	7.55117	7.55117	7.55117
Mineral Feedstock	1	Opexvar	€[2022]/tMgCO3	15.488	€[2020]/tCO2	13.785	Faber 2022, Strunge 2022		Opexvar	€[2020]/tCO2	14.9837	14.9837	14.9837	14.9837	14.9837	14.9837	14.9837	14.9837	14.9837	14.9837	14.9837	14.9837	14.9837	14.9837	14.9837	14.9837	14.9837
	1	Lifetime	a	50	a	50	Ostovari 2020		Lifetime	a	50	50	50	50	50	50	50	50	50	50	50	50	50	50	50	50	50
		FLH	h	7884	h	7884			FLH	h	7884	7971.6	8059.2	8146.8	8234.4	8322	8322	8322	8322	8322	8322	8322	8322	8322	8322	8322	8322
		Carbon eff	-	0.92	-	0.92	Naraharisetti 2019, Kelemen 2020		Carbon eff	-	0.92	0.92	0.92	0.92	0.92	0.92	0.92	0.92	0.92	0.92	0.92	0.92	0.92	0.92	0.92	0.92	0.92
									crf	-	0.0724598	0.0724598	0.0724598	0.0724598	0.0724598	0.0724598	0.0724598	0.0724598	0.0724598	0.0724598	0.0724598	0.0724598	0.0724598	0.0724598	0.0724598	0.0724598	0.0724598
		Energy balance							LCO w/o energy w/o commodities	€[2020]/tCO2	40.7734	40.7734	40.7734	36.8681	33.811	31.4474	29.711	28.6367	28.1727	28.0358	28.0027	27.9951	27.9934	27.9931	27.993	27.993	27.993
	1	Electricity,in	kWh,el/tCO2	455	MWh,el/tCO2	0.455	Ostovari 2022		Electricity,in	€[2020]/tCO2	18.7915	18.7915	18.7915	17.8133	16.835	12.2622	7.6895	7.39375	7.098	6.80225	6.5065	6.5065	6.5065	6.5065	6.5065	6.5065	6.5065
	1	Heat,in	kWh,th/tCO2	452	MWh,th/tCO2	0.452	Ostovari 2022		Heat,in	€[2020]/tCO2	14.1511	13.7481	13.3727	12.5881	10.8117	8.67863	6.45059	6.23957	6.04134	5.85477	5.67886	5.67886	5.67886	5.67886	5.67886	5.67886	5.67886
		Heat,out	kWh,th/tCO2	0	MWh,th/tCO2	0			Heat,out	€[2020]/tCO2	0	0	0	0	0	0	0	0	0	0	0	0	0	0	0	0	0
		Mass balance							LCO w/o commodities	€[2020]/tCO2	73.7161	73.3131	72.9376	67.2694	61.4576	52.3882	43.8511	42.27	41.312	40.6928	40.188	40.1805	40.1788	40.1784	40.1783	40.1783	40.1783
		Water	m3/tCO2		m3/tCO2	0			Water,in	€[2020]/tCO2	0	0	0	0	0	0	0	0	0	0	0	0	0	0	0	0	0
		Serpentine	t/tCO2	2.55	t/tCO2	2.55	Ostovari 2022		Serpentine,in	€[2020]/tCO2	0	0	0	0	0	0	0	0	0	0	0	0	0	0	0	0	0
		MgCO3	t/tCO2	-1.92	t/tCO2	-1.92	Ostovari 2022		MgCO3,out	€[2020]/tCO2	0	0	0	0	0	0	0	0	0	0	0	0	0	0	0	0	0
		SiO2	t/tCO2	-0.91	t/tCO2	-0.91	Ostovari 2022		SiO2,out	€[2020]/tCO2	0	0	0	0	0	0	0	0	0	0	0	0	0	0	0	0	0
		Other							LCO w DAC	€[2020]/tCO2	233.709	222.117	187.98	166.215	128.516	106.571	83.7336	79.4508	76.7314	75.1404	73.8577	73.599	73.2289	72.746	72.3427	72.1712	72.0635
		Temperature	°C	??	°C	??				Capex	18.2386	18.2386	18.2386	14.3332	11.2761	8.9125	7.17617	6.10184	5.63781	5.50092	5.4678	5.46027	5.45858	5.4582	5.45812	5.4581	5.4581
		Pressure	bar	115	bar	115	Ostovari 2022			Opexfix	7.55117	7.55117	7.55117	7.55117	7.55117	7.55117	7.55117	7.55117	7.55117	7.55117	7.55117	7.55117	7.55117	7.55117	7.55117	7.55117	7.55117
										Opexvar	14.9837	14.9837	14.9837	14.9837	14.9837	14.9837	14.9837	14.9837	14.9837	14.9837	14.9837	14.9837	14.9837	14.9837	14.9837	14.9837	14.9837
										Electricity	18.7915	18.7915	18.7915	17.8133	16.835	12.2622	7.6895	7.39375	7.098	6.80225	6.5065	6.5065	6.5065	6.5065	6.5065	6.5065	6.5065
										Heat	14.1511	13.7481	13.3727	12.5881	10.8117	8.67863	6.45059	6.23957	6.04134	5.85477	5.67886	5.67886	5.67886	5.67886	5.67886	5.67886	5.67886
		MINEX,Olivine
		Objective	Original Unit	Original Value	Unit	Value	Reference		Objective	Unit	2020	2025	2030	2035	2040	2045	2050	2055	2060	2065	2070	2075	2080	2085	2090	2095	2100
		Capex	€[2022]/(tCO2/a)	234.16	€[2020]/(tCO2/a)	208.412	Faber 2022, Strunge 2022		Capex	€[2020]/(tCO2/a)	18.2386	18.2386	18.2386	14.3332	11.2761	8.9125	7.17617	6.10184	5.63781	5.50092	5.4678	5.46027	5.45858	5.4582	5.45812	5.4581	5.4581
		Opexfix	€[2022]/tCO2	0.03	€[2020]/tCO2	6.25237	Faber 2022, Strunge 2022		Opexfix	€[2020]/tCO2	7.55117	7.55117	7.55117	7.55117	7.55117	7.55117	7.55117	7.55117	7.55117	7.55117	7.55117	7.55117	7.55117	7.55117	7.55117	7.55117	7.55117
	Mineral Feedstock	Opexvar	€[2022]/tMgCO3	15.488	€[2020]/tCO2	13.785	Faber 2022, Strunge 2022		Opexvar	€[2020]/tCO2	14.9837	14.9837	14.9837	14.9837	14.9837	14.9837	14.9837	14.9837	14.9837	14.9837	14.9837	14.9837	14.9837	14.9837	14.9837	14.9837	14.9837
		Lifetime	a	50	a	50	Ostovari 2020		Lifetime	a	50	50	50	50	50	50	50	50	50	50	50	50	50	50	50	50	50
		FLH	h	361788	h	361788			FLH	h	7884	7971.6	8059.2	8146.8	8234.4	8322	8322	8322	8322	8322	8322	8322	8322	8322	8322	8322	8322
		Carbon eff	-	0.92	-	0.92			Carbon eff	-	0.92	0.92	0.92	0.92	0.92	0.92	0.92	0.92	0.92	0.92	0.92	0.92	0.92	0.92	0.92	0.92	0.92
									crf	-	0.0724598	0.0724598	0.0724598	0.0724598	0.0724598	0.0724598	0.0724598	0.0724598	0.0724598	0.0724598	0.0724598	0.0724598	0.0724598	0.0724598	0.0724598	0.0724598	0.0724598
		Energy balance							LCO w/o energy w/o commodities	€[2020]/tCO2	40.7734	40.7734	40.7734	36.8681	33.811	31.4474	29.711	28.6367	28.1727	28.0358	28.0027	27.9951	27.9934	27.9931	27.993	27.993	27.993
		Electricity,in	kWh,el/tCO2	689	MWh,el/tCO2	0.689	Ostovari 2022		Electricity,in	€[2020]/tCO2	28.4557	28.4557	28.4557	26.9743	25.493	18.5685	11.6441	11.1962	10.7484	10.3005	9.8527	9.8527	9.8527	9.8527	9.8527	9.8527	9.8527
		Heat,in	kWh,el/tCO2	103	MWh,th/tCO2	0.103	Ostovari 2022		Heat,in	€[2020]/tCO2	4.2539	4.2539	4.2539	4.03245	3.811	2.77585	1.7407	1.67375	1.6068	1.53985	1.4729	1.4729	1.4729	1.4729	1.4729	1.4729	1.4729
		Heat,out	kWh,el/tCO2	0	MWh,th/tCO2	0	Ostovari 2022		Heat,out	€[2020]/tCO2	0	0	0	0	0	0	0	0	0	0	0	0	0	0	0	0	0
		Mass balance							LCO w/o commodities	€[2020]/tCO2	73.483	73.483	73.483	67.8749	63.115	52.7918	43.0958	41.5067	40.5279	39.8762	39.3283	39.3207	39.319	39.3187	39.3186	39.3186	39.3186
		Water	m3/tCO2		m3/tCO2	0			Water,in	m3/tCO2	0	0	0	0	0	0	0	0	0	0	0	0	0	0	0	0	0
		Olivine	t/tCO2	2	t/tCO2	2	Ostovari 2022		Olivine,in	t/tCO2	0	0	0	0	0	0	0	0	0	0	0	0	0	0	0	0	0
		MgCO3	t/tCO2	-1.92	t/tCO2	-1.92	Ostovari 2022		MgCO3,out	t/tCO2	0	0	0	0	0	0	0	0	0	0	0	0	0	0	0	0	0
		SiO2	t/tCO2	-0.68	t/tCO2	-0.68	Ostovari 2022		SiO2,out	t/tCO2	0	0	0	0	0	0	0	0	0	0	0	0	0	0	0	0	0
		Other							LCO w DAC	t/tCO2	233.476	222.287	188.526	166.82	130.174	106.974	82.9783	78.6875	75.9473	74.3238	72.9979	72.7392	72.3692	71.8863	71.483	71.3115	71.2037
		Temperature	°C	196.9	°C	196.9	Bremen 2022			Capex	18.2386	18.2386	18.2386	14.3332	11.2761	8.9125	7.17617	6.10184	5.63781	5.50092	5.4678	5.46027	5.45858	5.4582	5.45812	5.4581	5.4581
		Pressure	bar	169.2	bar	169.2	Bremen 2022			Opexfix	7.55117	7.55117	7.55117	7.55117	7.55117	7.55117	7.55117	7.55117	7.55117	7.55117	7.55117	7.55117	7.55117	7.55117	7.55117	7.55117	7.55117
										Opexvar	14.9837	14.9837	14.9837	14.9837	14.9837	14.9837	14.9837	14.9837	14.9837	14.9837	14.9837	14.9837	14.9837	14.9837	14.9837	14.9837	14.9837
										Electricity	28.4557	28.4557	28.4557	26.9743	25.493	18.5685	11.6441	11.1962	10.7484	10.3005	9.8527	9.8527	9.8527	9.8527	9.8527	9.8527	9.8527
										Heat	4.2539	4.2539	4.2539	4.03245	3.811	2.77585	1.7407	1.67375	1.6068	1.53985	1.4729	1.4729	1.4729	1.4729	1.4729	1.4729	1.4729
		MINEX,SteelSlag
		Objective	Original Unit	Original Value	Unit	Value	Reference		Objective	Unit	2020	2025	2030	2035	2040	2045	2050	2055	2060	2065	2070	2075	2080	2085	2090	2095	2100
		Capex	€[2022]/(tCO2/a)	234.16	€[2020]/(tCO2/a)	208.412	Faber 2022, Strunge 2022		Capex	€[2020]/(tCO2/a)	18.2386	18.2386	18.2386	14.3332	11.2761	8.9125	7.17617	6.10184	5.63781	5.50092	5.4678	5.46027	5.45858	5.4582	5.45812	5.4581	5.4581
		Opexfix	€[2022]/tCO2	0.03	€[2020]/tCO2	6.25237	Faber 2022, Strunge 2022		Opexfix	€[2020]/tCO2	7.55117	7.55117	7.55117	7.55117	7.55117	7.55117	7.55117	7.55117	7.55117	7.55117	7.55117	7.55117	7.55117	7.55117	7.55117	7.55117	7.55117
	Feedstock	Opexvar	€[2022]/tMgCO3	0	€[2020]/tCO2	0	Faber 2022, Strunge 2022		Opexvar	€[2020]/tCO2	0	0	0	0	0	0	0	0	0	0	0	0	0	0	0	0	0
		Lifetime	a	50	a	50	Ostovari 2020		Lifetime	a	50	50	50	50	50	50	50	50	50	50	50	50	50	50	50	50	50
		FLH	h	7875	h	7875			FLH	h	7884	7971.6	8059.2	8146.8	8234.4	8322	8322	8322	8322	8322	8322	8322	8322	8322	8322	8322	8322
		Carbon eff	-	0.92	-	0.92			Carbon eff	-	0.92	0.92	0.92	0.92	0.92	0.92	0.92	0.92	0.92	0.92	0.92	0.92	0.92	0.92	0.92	0.92	0.92
									crf	-	0.0724598	0.0724598	0.0724598	0.0724598	0.0724598	0.0724598	0.0724598	0.0724598	0.0724598	0.0724598	0.0724598	0.0724598	0.0724598	0.0724598	0.0724598	0.0724598	0.0724598
		Energy balance							LCO w/o energy w/o commodities	€[2020]/tCO2	25.7897	25.7897	25.7897	21.8844	18.8273	16.4637	14.7273	13.653	13.189	13.0521	13.019	13.0114	13.0098	13.0094	13.0093	13.0093	13.0093
		Electricity,in	kWh,el/tCO2	592	MWh,el/tCO2	0.592	Ostovari 2022		Electricity,in	€[2020]/tCO2	24.4496	24.4496	24.4496	23.1768	21.904	15.9544	10.0048	9.62	9.2352	8.8504	8.4656	8.4656	8.4656	8.4656	8.4656	8.4656	8.4656
		Heat,in	kWh,th/tCO2	407	MWh,th/tCO2	0.407	Ostovari 2022		Heat,in	€[2020]/tCO2	16.8091	16.8091	16.8091	15.934	15.059	10.9686	6.8783	6.61375	6.3492	6.08465	5.8201	5.8201	5.8201	5.8201	5.8201	5.8201	5.8201
		Heat,out	kWh,th/tCO2	0	MWh,th/tCO2	0	Ostovari 2022		Heat,out	€[2020]/tCO2	0	0	0	0	0	0	0	0	0	0	0	0	0	0	0	0	0
		Mass balance							LCO w/o commodities	€[2020]/tCO2	67.0484	67.0484	67.0484	60.9952	55.7903	43.3867	31.6104	29.8868	28.7734	27.9871	27.3047	27.2971	27.2955	27.2951	27.295	27.295	27.295
		Water	m3/tCO2		m3/tCO2	0			Water,in	m3/tCO2	0	0	0	0	0	0	0	0	0	0	0	0	0	0	0	0	0
		SteelSlag	t/tCO2	4.4	t/tCO2	4.4	Ostovari 2022		Olivine,in	t/tCO2	0	0	0	0	0	0	0	0	0	0	0	0	0	0	0	0	0
		CaCO3	t/tCO2	-2.27	t/tCO2	-2.27	Ostovari 2022		MgCO3,out	t/tCO2	0	0	0	0	0	0	0	0	0	0	0	0	0	0	0	0	0
		SiO2	t/tCO2	-0.68	t/tCO2	-0.68	Ostovari 2022		SiO2,out	t/tCO2	0	0	0	0	0	0	0	0	0	0	0	0	0	0	0	0	0
		Other							LCO w DAC	t/tCO2	227.041	215.853	182.091	159.94	122.849	97.5692	71.4929	67.0675	64.1928	62.4348	60.9743	60.7156	60.3456	59.8627	59.4594	59.2879	59.1801
		Temperature	°C		°C		Ostovari 2022			Capex	18.2386	18.2386	18.2386	14.3332	11.2761	8.9125	7.17617	6.10184	5.63781	5.50092	5.4678	5.46027	5.45858	5.4582	5.45812	5.4581	5.4581
		Pressure	bar	20	bar	20	Ostovari 2022			Opexfix	7.55117	7.55117	7.55117	7.55117	7.55117	7.55117	7.55117	7.55117	7.55117	7.55117	7.55117	7.55117	7.55117	7.55117	7.55117	7.55117	7.55117
										Opexvar	0	0	0	0	0	0	0	0	0	0	0	0	0	0	0	0	0
										Electricity	24.4496	24.4496	24.4496	23.1768	21.904	15.9544	10.0048	9.62	9.2352	8.8504	8.4656	8.4656	8.4656	8.4656	8.4656	8.4656	8.4656
										Heat	16.8091	16.8091	16.8091	15.934	15.059	10.9686	6.8783	6.61375	6.3492	6.08465	5.8201	5.8201	5.8201	5.8201	5.8201	5.8201	5.8201
Sensitivity - total cost - MINEX - Serpentine
	Capex						Opex fix						Opexvar						Lifetime						Electricity demand						Heat demand
		MINEX - Serpentine						MINEX - Serpentine						MINEX - Serpentine						MINEX - Serpentine						MINEX - Serpentine						MINEX - Serpentine
		233.709						233.709						233.709						233.709						233.709						233.709
	0.5	224.589		0.96098			0.5	229.933		0.983845			0.5	226.217		0.967944			0.5	237.069		1.01438			0.5	224.313		0.959797			0.5	226.633		0.969725
	0.75	229.149		0.98049			0.75	231.821		0.991922			0.75	229.963		0.983972			0.75	234.603		1.00383			0.75	229.011		0.979899			0.75	230.171		0.984862
	1	233.709		1			1	233.709		1			1	233.709		1			1	233.709		1			1	233.709		1			1	233.709		1
	1.25	238.268		1.01951			1.25	235.596		1.00808			1.25	237.455		1.01603			1.25	233.35		0.998466			1.25	238.407		1.0201			1.25	237.246		1.01514
	1.5	242.828		1.03902			1.5	237.484		1.01616			1.5	241.2		1.03206			1.5	233.2		0.997825			1.5	243.104		1.0402			1.5	240.784		1.03028

## Sheet: EW
									WACC	-	0.07	0.07	0.07	0.07	0.07	0.07	0.07	0.07	0.07	0.07	0.07	0.07	0.07	0.07	0.07	0.07	0.07
									Availability	-	0.9	0.91	0.92	0.93	0.94	0.95	0.95	0.95	0.95	0.95	0.95	0.95	0.95	0.95	0.95	0.95	0.95
									Electricity cost	€/MWh	41.3	41.3	41.3	39.15	37	26.95	16.9	16.25	15.6	14.95	14.3	14.3	14.3	14.3	14.3	14.3	14.3
									Heat,LT cost	€/MWh	31.3078	30.4162	29.5856	27.8497	23.9196	19.2005	14.2712	13.8044	13.3658	12.953	12.5638	12.5638	12.5638	12.5638	12.5638	12.5638	12.5638
									Heat,HT cost	€/MWh	41.3	41.3	41.3	39.15	37	26.95	16.9	16.25	15.6	14.95	14.3	14.3	14.3	14.3	14.3	14.3	14.3
									Rock handling	€/tRock	31.269	31.269	31.269	30.3896	29.5102	25.3996	21.2889	21.0231	20.7572	20.4913	20.2255	20.2255	20.2255	20.2255	20.2255	20.2255	20.2255
	For sensitivity	EW
		Objective	Original Unit	Original Value	Unit	Value	Reference		Objective	Unit	2020	2025	2030	2035	2040	2045	2050	2055	2060	2065	2070	2075	2080	2085	2090	2095	2100
	1	Capex	USD[2015]/(tRock/a)	5	€[2020]/(tCO2/a)	4.425	Strefler 2018		Capex	€[2020]/tCO2	0.356261	0.356261	0.356261	0.356261	0.356261	0.356261	0.356261	0.356261	0.356261	0.356261	0.356261	0.356261	0.356261	0.356261	0.356261	0.356261	0.356261
	1	Opexfix	USD[2015]/(tRock)	25.1	€[2020]/tCO2	22.3401	Strefler 2018		Opexfix	€[2020]/tCO2	24.8223	24.8223	24.8223	24.8223	24.8223	24.8223	24.8223	24.8223	24.8223	24.8223	24.8223	24.8223	24.8223	24.8223	24.8223	24.8223	24.8223
									Opexvar	€[2020]/tCO2	62.5379	62.5379	62.5379	60.7791	59.0204	50.7991	42.5778	42.0461	41.5144	40.9827	40.4509	40.4509	40.4509	40.4509	40.4509	40.4509	40.4509
	1	Lifetime	a	50	a	50			Lifetime	a	50	50	50	50	50	50	50	50	50	50	50	50	50	50	50	50	50
		FLH	h	7884	h	7884			FLH	h	7884	7971.6	8059.2	8146.8	8234.4	8322	8322	8322	8322	8322	8322	8322	8322	8322	8322	8322	8322
		Carbon efficiency				1			Carbon eff	-	1	1	1	1	1	1	1	1	1	1	1	1	1	1	1	1	1
									crf	-	0.0724598	0.0724598	0.0724598	0.0724598	0.0724598	0.0724598	0.0724598	0.0724598	0.0724598	0.0724598	0.0724598	0.0724598	0.0724598	0.0724598	0.0724598	0.0724598	0.0724598
		Energy balance	Included in feedstock preparation						LCOCDR x energy x commodities	€[2020]/tCO2	87.7165	87.7165	87.7165	85.9577	84.199	75.9777	67.7564	67.2247	66.693	66.1613	65.6295	65.6295	65.6295	65.6295	65.6295	65.6295	65.6295
		Electricity,in	kWh,el/tCO2	0	MWh,el/tCO2	0			Electricity,in	€[2020]/tCO2	0	0	0	0	0	0	0	0	0	0	0	0	0	0	0	0	0
		Heat,in	kWh,th/tCO2	0	MWh,th/tCO2	0			Heat,in	€[2020]/tCO2	0	0	0	0	0	0	0	0	0	0	0	0	0	0	0	0	0
		Heat,out	kWh,th/tCO2	0	MWh,th/tCO2	0			Heat,out	€[2020]/tCO2	0	0	0	0	0	0	0	0	0	0	0	0	0	0	0	0	0
		Mass balance							LCOCDR x commodities	€[2020]/tCO2	87.7165	87.7165	87.7165	85.9577	84.199	75.9777	67.7564	67.2247	66.693	66.1613	65.6295	65.6295	65.6295	65.6295	65.6295	65.6295	65.6295
									Water,in	€[2020]/tCO2	0	0	0	0	0	0	0	0	0	0	0	0	0	0	0	0	0
									Serpentine,in	€[2020]/tCO2	0	0	0	0	0	0	0	0	0	0	0	0	0	0	0	0	0
									MgCO3,out	€[2020]/tCO2	0	0	0	0	0	0	0	0	0	0	0	0	0	0	0	0	0
									SiO2,out	€[2020]/tCO2	0	0	0	0	0	0	0	0	0	0	0	0	0	0	0	0	0
		Other							LCOCDR	€[2020]/tCO2	87.7165	87.7165	87.7165	85.9577	84.199	75.9777	67.7564	67.2247	66.693	66.1613	65.6295	65.6295	65.6295	65.6295	65.6295	65.6295	65.6295
										Capex	0.356261	0.356261	0.356261	0.356261	0.356261	0.356261	0.356261	0.356261	0.356261	0.356261	0.356261	0.356261	0.356261	0.356261	0.356261	0.356261	0.356261
										Opexfix	24.8223	24.8223	24.8223	24.8223	24.8223	24.8223	24.8223	24.8223	24.8223	24.8223	24.8223	24.8223	24.8223	24.8223	24.8223	24.8223	24.8223
										Opexvar	62.5379	62.5379	62.5379	60.7791	59.0204	50.7991	42.5778	42.0461	41.5144	40.9827	40.4509	40.4509	40.4509	40.4509	40.4509	40.4509	40.4509
										Electricity	0	0	0	0	0	0	0	0	0	0	0	0	0	0	0	0	0
										Heat	0	0	0	0	0	0	0	0	0	0	0	0	0	0	0	0	0
	1								Rock feedstock demand	tRock/tCO2	2	2	2	2	2	2	2	2	2	2	2	2	2	2	2	2	2
									Kelemen 2019
									„The CO2 uptake and storage capacity for complete carbonation in these materials is significant: 0.62 tons of CO2 per ton of olivine reactant, 0.76 tons of CO2 per ton of brucite reactant, and ~0.4 to 0.5 tons of CO2 per ton of pyroxene, serpentine, wollastonite, and industrial waste similar to wollastonite in composition“ (Kelemen et al., 2020, p. 4)
Sensitivity - total cost - EW
	Capex						Opex fix						Lifetime						Feedstock demand
		EW						EW						EW						EW
		87.7165						87.7165						87.7165						87.7165
	0.5	87.5384		0.997969			0.5	75.3053		0.858508			0.5	87.7821		1.00075			0.5	56.4475		0.643523
	0.75	87.6274		0.998985			0.75	81.5109		0.929254			0.75	87.734		1.0002			0.75	72.082		0.821761
	1	87.7165		1			1	87.7165		1			1	87.7165		1			1	87.7165		1
	1.25	87.8056		1.00102			1.25	93.9221		1.07075			1.25	87.7095		0.99992			1.25	103.351		1.17824
	1.5	87.8946		1.00203			1.5	100.128		1.14149			1.5	87.7066		0.999887			1.5	118.985		1.35648

## Sheet: DAC
									WACC	-	0.07	0.07	0.07	0.07	0.07	0.07	0.07	0.07	0.07	0.07	0.07	0.07	0.07	0.07	0.07	0.07	0.07
									Availability	-	0.9	0.91	0.92	0.93	0.94	0.95	0.95	0.95	0.95	0.95	0.95	0.95	0.95	0.95	0.95	0.95	0.95
									Electricity cost	€/MWh	41.3	41.3	41.3	39.15	37	26.95	16.9	16.25	15.6	14.95	14.3	14.3	14.3	14.3	14.3	14.3	14.3
									Heat,HP @100°C cost	€/MWh	31.3078	30.4162	29.5856	27.8497	23.9196	19.2005	14.2712	13.8044	13.3658	12.953	12.5638	12.5638	12.5638	12.5638	12.5638	12.5638	12.5638
									Heat,HT cost	€/MWh	41.3	41.3	41.3	39.15	37	26.95	16.9	16.25	15.6	14.95	14.3	14.3	14.3	14.3	14.3	14.3	14.3
	For sensitivity	LT-DAC							LTDAC
		Objective	Original Unit	Original Value	Unit	Value	Reference		Objective	Unit	2020	2025	2030	2035	2040	2045	2050	2055	2060	2065	2070	2075	2080	2085	2090	2095	2100
		Capex					Mühlbauer 2024		Capex	€[2020]/(tCO2/a)
		Opexfix							Opexfix	€[2020]/tCO2
		Opexvar							Opexvar	€[2020]/tCO2
		Lifetime							Lifetime	a
		FLH							FLH	h
		Carbon eff							Carbon eff	-
									crf	-
	1								LCO w/o Energy	€[2020]/tCO2	94.8789	85.2507	61.3719	48.3618	28.7869	24.0198	21.0798	19.0109	17.8511	17.4525	17.2217	16.9705	16.6022	16.1197	15.7164	15.5449	15.4372
	1								Electricity,in	MWh,el/tCO2	0.25	0.25	0.225	0.225	0.203	0.203	0.182	0.182	0.182	0.182	0.182	0.182	0.182	0.182	0.182	0.182	0.182
	1								Heat,in	MWh,th/tCO2	1.75	1.75	1.5	1.5	1.286	1.286	1.102	1.102	1.102	1.102	1.102	1.102	1.102	1.102	1.102	1.102	1.102
									Heat,out	MWh,th/tCO2	0	0	0	0	0	0	0	0	0	0	0	0	0	0	0	0	0
									LCO w/ Energy	€[2020]/tCO2	159.993	148.804	115.043	98.9452	67.0586	54.1825	39.8824	37.1808	35.4194	34.4476	33.6696	33.4185	33.0501	32.5676	32.1644	31.9929	31.8852
									Water,in	m3/tCO2	0	0	0	0	0	0	0	0	0	0	0	0	0	0	0	0	0
											250	250	225	225	203	203	182	182	182	182	182	182	182	182	182	182	182
											1750	1750	1500	1500	1286	1286	1102	1102	1102	1102	1102	1102	1102	1102	1102	1102	1102
Sensitivity - cost - DAC
	LCO w/o Energy						Electricity demand						Heat demand
		DAC						DAC						DAC
		159.993						159.993						159.993
	0.5	112.553		0.70349			0.5	154.83		0.967733			0.5	132.598		0.828777
	0.75	136.273		0.851745			0.75	157.411		0.983866			0.75	146.295		0.914389
	1	159.993		1			1	159.993		1			1	159.993		1
	1.25	183.712		1.14826			1.25	162.574		1.01613			1.25	173.69		1.08561
	1.5	207.432		1.29651			1.5	165.155		1.03227			1.5	187.387		1.17122

[truncated: 10 more sheets: Heat Pump, MININ_Pot, MINEX_IW_Pot, EW_Pot, Mining, Transport, Comminution, Rock Handling, Conversion, Learning]
